# Supplementary material
Source: PubMed Central journal article supplement (PMC4926962)
Supplement: ASN.2014121193_ASN2014121193SupplementaryData.pdf [file ASN.2014121193_ASN2014121193SupplementaryData.pdf]

Supplemental Table A: Net secretion & CKD correlates – Comparing low (Cat 1), medium (Cat 2), and high (Cat 3) cinnamoylglycine clearance, for subjects with same average Ur-Cr clearance

| Characteristics, mean(SD) unless noted                          | Category 1<br>(Low)<br>N=98 | Category 2<br>(Medium)<br>N=99 | Category 3<br>(High)<br>N=99 | <i>P</i> for<br><i>trend</i> |
|-----------------------------------------------------------------|-----------------------------|--------------------------------|------------------------------|------------------------------|
| Age, years                                                      | 60.5 (14.5)                 | 59.5 (14.5)                    | 59.0 (12.0)                  | 0.75                         |
| Male gender, n(%)                                               | 67 (69.1%)                  | 82 (82.8%)                     | 85 (85.0%)                   | 0.01                         |
| Black race, n(%)                                                | 21 (21.6%)                  | 29 (29.3%)                     | 28 (28.0%)                   | 0.43                         |
| Other non-white race, n(%)                                      | 13 (13.4%)                  | 8 (8.1%)                       | 6 (6.0%)                     | 0.18                         |
| Urea-creatinine clearance, mL/min                               | 54.6 (30.6)                 | 55.1 (38.2)                    | 53.2 (27.7)                  | 0.92                         |
| Daily creatinine excretion / lean body mass, mg/kg <sup>†</sup> | 31.0 (12.8)                 | 30.8 (12.8)                    | 30.5 (11.0)                  | 0.96                         |
| Estimated GFR, mL/min/1.73m <sup>3</sup> <sup>†</sup>           | 48.3 (28.1)                 | 46.4 (26.7)                    | 47.9 (23.6)                  | 0.87                         |
| Body mass index, kg/m <sup>2</sup>                              | 31.5 (7.7)                  | 31.5 (7.2)                     | 32.0 (7.7)                   | 0.87                         |
| Systolic blood pressure, mmHg                                   | 132.6 (22.2)                | 130.9 (20.7)                   | 129.4 (20.1)                 | 0.55                         |
| Current smoking, n(%)                                           | 16 (16%)                    | 17 (17%)                       | 24 (24%)                     | 0.29                         |
| Current alcohol use, n(%)                                       | 23 (23.7%)                  | 32 (32.3%)                     | 39 (39.0%)                   | 0.07                         |
| Medications use:                                                |                             |                                |                              |                              |
| Aspirin, n(%)                                                   | 34 (35.1%)                  | 38 (38.4%)                     | 45 (45.0%)                   | 0.35                         |
| Statin, n(%)                                                    | 49 (50.5%)                  | 54 (54.5%)                     | 63 (63.0%)                   | 0.20                         |
| H2 blocker, n(%)                                                | 8 (8.2%)                    | 10 (10.1%)                     | 9 (9.0%)                     | 0.90                         |
| Loop diuretic, n(%)                                             | 42 (43.3%)                  | 40 (40.4%)                     | 36 (36.0%)                   | 0.57                         |
| Thiazide, n(%)                                                  | 12 (12.4%)                  | 15 (15.2%)                     | 16 (16.0%)                   | 0.75                         |
| ACE inhibitor, n(%)                                             | 55 (56.7%)                  | 50 (50.5%)                     | 59 (59.0%)                   | 0.46                         |
| Angiotensin-R blocker, n(%)                                     | 36 (37.1%)                  | 40 (40.4%)                     | 35 (35.0%)                   | 0.73                         |
| Colchicine, n(%)                                                | 7 (7.2%)                    | 4 (4.0%)                       | 6 (6.0%)                     | 0.63                         |
| EPO, n(%)                                                       | 3 (3.1%)                    | 6 (6.1%)                       | 4 (4.0%)                     | 0.58                         |
| Insulin, n(%)                                                   | 25 (25.8%)                  | 26 (26.3%)                     | 28 (28.0%)                   | 0.93                         |
| Oral diabetes medication, n(%) <sup>†</sup>                     | 21 (21.6%)                  | 18 (18.2%)                     | 21 (21.0%)                   | 0.81                         |
| Prevalent diabetes, n(%) <sup>†</sup>                           | 50 (51.5%)                  | 52 (52.5%)                     | 55 (55.0%)                   | 0.88                         |
| Prevalent cardiovascular disease, n(%) <sup>†</sup>             | 8 (8.2%)                    | 12 (12.1%)                     | 5 (5.0%)                     | 0.19                         |
| Laboratory measures:                                            |                             |                                |                              |                              |
| Hemoglobin A1c, %                                               | 6.7 (1.9)                   | 6.4 (1.4)                      | 6.5 (1.2)                    | 0.26                         |
| Cholesterol, mg/dL                                              | 174.4 (61.5)                | 176.6 (59.1)                   | 162.8 (44.2)                 | 0.17                         |
| C-Reactive Protein, mg/L                                        | 5.9 (10.7)                  | 5.1 (6.6)                      | 5.8 (8.0)                    | 0.77                         |
| CO2 (bicarbonate), mmol/L                                       | 24.5 (3.6)                  | 24.8 (3.7)                     | 25.0 (3.3)                   | 0.60                         |
| Fractional excretion Phosphorus, %                              | 29.4 (13.0)                 | 31.4 (16.3)                    | 27.3 (19.0)                  | 0.21                         |
| Fractional excretion Uric Acid, %                               | 6.9 (3.9)                   | 7.6 (4.2)                      | 6.5 (6.7)                    | 0.30                         |
| Fractional excretion Calcium, %                                 | 1.3 (1.3)                   | 1.5 (2.5)                      | 1.1 (1.2)                    | 0.40                         |
| Fractional excretion Sodium, %                                  | 1.6 (1.4)                   | 1.7 (1.4)                      | 1.5 (1.5)                    | 0.38                         |
| Fractional excretion Potassium, %                               | 17.3 (16.5)                 | 14.9 (9.4)                     | 12.5 (7.5)                   | 0.02                         |
| Albumin excretion rate, mg/d, med(IQR)                          | 209 (27, 810)               | 161 (17, 963)                  | 159 (20, 1124)               | 0.62 <sup>‡</sup>            |

<sup>†</sup> Oral diabetes medications metformin or sulfonylurea; prevalent diabetes based on self-report, physician diagnosis, use of DM medications, or fasting glucose; cardiovascular disease (CVD) defined as coronary artery disease (CAD), heart failure (HF), peripheral vascular disease (PVD), or cerebrovascular disease (CBVD)

<sup>‡</sup> Test for trend of median AER over categories of clearance based on quantile regression.

Supplemental Table B: Net secretion & CKD correlates – Comparing low (Cat 1), medium (Cat 2), and high (Cat 3) P-cresol sulfate clearance, for subjects with same average Ur-Cr clearance

| Characteristics, mean(SD) unless noted                          | Category 1<br>(Low)<br>N=95 | Category 2<br>(Medium)<br>N=97 | Category 3<br>(High)<br>N=97 | <i>P</i> for<br><i>trend</i> |
|-----------------------------------------------------------------|-----------------------------|--------------------------------|------------------------------|------------------------------|
| Age, years                                                      | 58.23 (13.71)               | 59.99 (13.82)                  | 60.86 (14.09)                | 0.41                         |
| Male gender, n(%)                                               | 72 (76%)                    | 80 (82%)                       | 75 (77%)                     | 0.50                         |
| Black race, n(%)                                                | 25 (26%)                    | 23 (24%)                       | 29 (30%)                     | 0.62                         |
| Other non-white race, n(%)                                      | 7 (7%)                      | 11 (11%)                       | 9 (9%)                       | 0.64                         |
| Urea-creatinine clearance, mL/min                               | 52.89 (30.13)               | 53.43 (32.17)                  | 54.19 (32.01)                | 0.96                         |
| Daily creatinine excretion / lean body mass, mg/kg <sup>†</sup> | 29.85 (11.52)               | 30.48 (11.14)                  | 31.18 (13.42)                | 0.75                         |
| Estimated GFR, mL/min/1.73m <sup>3</sup> <sup>†</sup>           | 48.26 (27.85)               | 45.83 (24.88)                  | 47.88 (26.38)                | 0.79                         |
| Body mass index, kg/m <sup>2</sup>                              | 31.03 (7.34)                | 31.96 (7.74)                   | 31.99 (7.72)                 | 0.61                         |
| Systolic blood pressure, mmHg                                   | 129.65 (20.64)              | 129.81 (19.26)                 | 134.46 (23.27)               | 0.20                         |
| Current smoking, n(%)                                           | 17 (18%)                    | 18 (19%)                       | 20 (21%)                     | 0.90                         |
| Current alcohol use, n(%)                                       | 34 (36%)                    | 31 (32%)                       | 25 (26%)                     | 0.32                         |
| Medications use:                                                |                             |                                |                              |                              |
| Aspirin, n(%)                                                   | 32 (34%)                    | 42 (43%)                       | 43 (44%)                     | 0.25                         |
| Statin, n(%)                                                    | 49 (52%)                    | 58 (60%)                       | 56 (58%)                     | 0.49                         |
| H2 blocker, n(%)                                                | 11 (12%)                    | 8 (8%)                         | 7 (7%)                       | 0.54                         |
| Loop diuretic, n(%)                                             | 34 (36%)                    | 40 (41%)                       | 45 (46%)                     | 0.33                         |
| Thiazide, n(%)                                                  | 14 (15%)                    | 12 (12%)                       | 15 (15%)                     | 0.81                         |
| ACE inhibitor, n(%)                                             | 56 (59%)                    | 55 (57%)                       | 52 (54%)                     | 0.76                         |
| Angiotensin-R blocker, n(%)                                     | 31 (33%)                    | 39 (40%)                       | 40 (41%)                     | 0.41                         |
| Colchicine, n(%)                                                | 4 (4%)                      | 10 (10%)                       | 3 (3%)                       | 0.07                         |
| EPO, n(%)                                                       | 4 (4%)                      | 3 (3%)                         | 6 (6%)                       | 0.57                         |
| Insulin, n(%)                                                   | 25 (26%)                    | 25 (26%)                       | 29 (30%)                     | 0.78                         |
| Oral diabetes medication, n(%) <sup>†</sup>                     | 17 (18%)                    | 19 (20%)                       | 22 (23%)                     | 0.70                         |
| Prevalent diabetes, n(%) <sup>†</sup>                           | 53 (56%)                    | 49 (51%)                       | 53 (55%)                     | 0.74                         |
| Prevalent cardiovascular disease, n(%) <sup>†</sup>             | 5 (5%)                      | 13 (13%)                       | 7 (7%)                       | 0.11                         |
| Laboratory measures:                                            |                             |                                |                              |                              |
| Hemoglobin A1c, %                                               | 6.42 (1.42)                 | 6.57 (1.56)                    | 6.63 (1.56)                  | 0.61                         |
| Cholesterol, mg/dL                                              | 180.38 (59.69)              | 168.60 (57.78)                 | 165.36 (49.49)               | 0.15                         |
| C-Reactive Protein, mg/L                                        | 5.03 (7.24)                 | 5.87 (9.09)                    | 5.52 (8.53)                  | 0.78                         |
| CO2 (bicarbonate), mmol/L                                       | 23.88 (3.80)                | 25.07 (3.18)                   | 25.44 (3.39)                 | 0.01                         |
| Fractional excretion Phosphorus, %                              | 31.22 (20.97)               | 29.94 (15.67)                  | 27.15 (11.32)                | 0.22                         |
| Fractional excretion Uric Acid, %                               | 7.76 (7.39)                 | 7.23 (3.94)                    | 6.11 (2.95)                  | 0.08                         |
| Fractional excretion Calcium, %                                 | 1.65 (2.85)                 | 1.21 (0.92)                    | 1.02 (0.97)                  | 0.05                         |
| Fractional excretion Sodium, %                                  | 1.90 (1.90)                 | 1.64 (1.23)                    | 1.31 (0.91)                  | 0.01                         |
| Fractional excretion Potassium, %                               | 15.34 (13.66)               | 15.52 (12.23)                  | 14.43 (9.74)                 | 0.79                         |
| Albumin excretion rate, mg/d, med(IQR)                          | 70.73 (36.84)               | 63.82 (29.76)                  | 60.19 (43.64)                | 0.14                         |

<sup>†</sup> Oral diabetes medications metformin or sulfonylurea; prevalent diabetes based on self-report, physician diagnosis, use of DM medications, or fasting glucose; cardiovascular disease (CVD) defined as coronary artery disease (CAD), heart failure (HF), peripheral vascular disease (PVD), or cerebrovascular disease (CBVD)

‡ Test for trend of median AER over categories of clearance based on quantile regression.

Supplemental Table C: Net secretion & CKD correlates – Comparing low (Cat 1), medium (Cat 2), and high (Cat 3) Indoxyl sulfate clearance, for subjects with same average Ur-Cr clearance

| Characteristics, mean(SD) unless noted                          | Category 1<br>(Low)<br>N=95 | Category 2<br>(Medium)<br>N=98 | Category 3<br>(High)<br>N=96 | <i>P for trend</i> |
|-----------------------------------------------------------------|-----------------------------|--------------------------------|------------------------------|--------------------|
| Age, years                                                      | 57.40 (14.14)               | 60.57 (14.80)                  | 60.86 (12.47)                | 0.16               |
| Male gender, n(%)                                               | 70 (74%)                    | 84 (86%)                       | 73 (76%)                     | 0.10               |
| Black race, n(%)                                                | 22 (23%)                    | 21 (21%)                       | 33 (34%)                     | 0.09               |
| Other non-white race, n(%)                                      | 8 (8%)                      | 13 (13%)                       | 6 (6%)                       | 0.23               |
| Urea-creatinine clearance, mL/min                               | 53.77 (33.73)               | 53.55 (32.15)                  | 54.27 (31.64)                | 0.99               |
| Daily creatinine excretion / lean body mass, mg/kg <sup>†</sup> | 29.52 (11.27)               | 31.70 (11.41)                  | 30.68 (13.82)                | 0.46               |
| Estimated GFR, mL/min/1.73m <sup>3</sup> <sup>†</sup>           | 49.79 (30.00)               | 43.58 (24.08)                  | 48.85 (24.74)                | 0.21               |
| Body mass index, kg/m <sup>2</sup>                              | 31.08 (7.21)                | 30.67 (7.27)                   | 33.10 (8.07)                 | 0.06               |
| Systolic blood pressure, mmHg                                   | 129.95 (21.37)              | 130.56 (19.47)                 | 133.40 (22.49)               | 0.48               |
| Current smoking, n(%)                                           | 16 (17%)                    | 19 (19%)                       | 21 (22%)                     | 0.72               |
| Current alcohol use, n(%)                                       | 35 (37%)                    | 31 (32%)                       | 26 (27%)                     | 0.35               |
| Medications use:                                                |                             |                                |                              |                    |
| Aspirin, n(%)                                                   | 31 (33%)                    | 35 (36%)                       | 51 (53%)                     | 0.01               |
| Statin, n(%)                                                    | 49 (52%)                    | 53 (54%)                       | 60 (63%)                     | 0.28               |
| H2 blocker, n(%)                                                | 11 (12%)                    | 8 (8%)                         | 7 (7%)                       | 0.55               |
| Loop diuretic, n(%)                                             | 31 (33%)                    | 38 (39%)                       | 49 (51%)                     | 0.03               |
| Thiazide, n(%)                                                  | 11 (12%)                    | 16 (16%)                       | 14 (15%)                     | 0.63               |
| ACE inhibitor, n(%)                                             | 58 (61%)                    | 50 (51%)                       | 53 (55%)                     | 0.37               |
| Angiotensin-R blocker, n(%)                                     | 30 (32%)                    | 41 (42%)                       | 38 (40%)                     | 0.31               |
| Colchicine, n(%)                                                | 6 (6%)                      | 7 (7%)                         | 4 (4%)                       | 0.66               |
| EPO, n(%)                                                       | 4 (4%)                      | 4 (4%)                         | 5 (5%)                       | 0.92               |
| Insulin, n(%)                                                   | 23 (24%)                    | 25 (26%)                       | 30 (31%)                     | 0.51               |
| Oral diabetes medication, n(%) <sup>†</sup>                     | 16 (17%)                    | 15 (15%)                       | 28 (29%)                     | 0.03               |
| Prevalent diabetes, n(%) <sup>†</sup>                           | 48 (51%)                    | 49 (50%)                       | 57 (59%)                     | 0.34               |
| Prevalent cardiovascular disease, n(%) <sup>†</sup>             | 4 (4%)                      | 14 (14%)                       | 7 (7%)                       | 0.04               |
| Laboratory measures:                                            |                             |                                |                              |                    |
| Hemoglobin A1c, %                                               | 6.31 (1.46)                 | 6.43 (1.44)                    | 6.84 (1.59)                  | 0.04               |
| Cholesterol, mg/dL                                              | 180.40 (58.77)              | 165.93 (56.36)                 | 167.09 (51.64)               | 0.14               |
| C-Reactive Protein, mg/L                                        | 5.21 (7.32)                 | 4.72 (8.17)                    | 6.52 (9.29)                  | 0.30               |
| CO2 (bicarbonate), mmol/L                                       | 23.97 (3.70)                | 24.74 (3.54)                   | 25.58 (3.13)                 | 0.01               |
| Fractional excretion Phosphorus, %                              | 30.14 (21.10)               | 33.37 (15.72)                  | 25.13 (9.96)                 | <0.01              |
| Fractional excretion Uric Acid, %                               | 7.87 (7.67)                 | 7.30 (3.39)                    | 5.92 (2.84)                  | 0.03               |
| Fractional excretion Calcium, %                                 | 1.68 (2.87)                 | 1.21 (0.90)                    | 0.97 (0.92)                  | 0.02               |
| Fractional excretion Sodium, %                                  | 1.85 (1.89)                 | 1.77 (1.29)                    | 1.24 (0.82)                  | 0.01               |
| Fractional excretion Potassium, %                               | 15.13 (13.96)               | 16.26 (12.63)                  | 13.84 (8.62)                 | 0.37               |
| Albumin excretion rate, mg/d, med(IQR)                          | 68.84 (37.71)               | 68.83 (31.18)                  | 56.73 (41.49)                | 0.03               |

<sup>†</sup> Oral diabetes medications metformin or sulfonylurea; prevalent diabetes based on self-report, physician diagnosis, use of DM medications, or fasting glucose; cardiovascular disease (CVD) defined as coronary artery disease (CAD), heart failure (HF), peripheral vascular disease (PVD), or cerebrovascular disease (CBVD)

‡ Test for trend of median AER over categories of clearance based on quantile regression.

| Supplemental Table D: Net secretion and events comparing categories of solute clearance relative to average Urea-Creatinine clearance, with adjustment for AER |                  |                                          |                                    |
|----------------------------------------------------------------------------------------------------------------------------------------------------------------|------------------|------------------------------------------|------------------------------------|
|                                                                                                                                                                | Number of events | Incidence / 100 py (95% CI) <sup>†</sup> | Hazard ratio (95% CI) <sup>‡</sup> |
| <b>(A) Hippurate</b>                                                                                                                                           |                  |                                          |                                    |
| Outcome: Death                                                                                                                                                 |                  |                                          |                                    |
| HA: Low (vs. High)                                                                                                                                             | 19               | 6.8 (3.8, 9.9)                           | 2.5 (1.2, 5.5)                     |
| HA: Medium (vs High)                                                                                                                                           | 12               | 4.4 (2.1, 7.0)                           | 1.1 (0.5, 2.5)                     |
| HA: High ( <i>Referent</i> )                                                                                                                                   | 11               | 3.8 (1.8, 6.6)                           | <i>Reference</i>                   |
| Outcome: Dialysis <sup>†</sup>                                                                                                                                 |                  |                                          |                                    |
| HA: Low (vs. High)                                                                                                                                             | 7                | 2.7 (0.9, 4.8)                           | 1.5 (0.3, 6.7)                     |
| HA: Medium (vs High)                                                                                                                                           | 7                | 2.6 (0.9, 4.8)                           | 1.1 (0.4, 3.0)                     |
| HA: High ( <i>Referent</i> )                                                                                                                                   | 6                | 2.1 (0.7, 4.4)                           | <i>Reference</i>                   |
| <b>(B) Cinnamoylglycine</b>                                                                                                                                    |                  |                                          |                                    |
| Outcome: Death <sup>†</sup>                                                                                                                                    |                  |                                          |                                    |
| CMG: Low (vs High)                                                                                                                                             | 12               | 4.4 (2.1, 7.0)                           | 1.0 (0.5, 2.1)                     |
| CMG: Medium (vs High)                                                                                                                                          | 16               | 5.8 (3.1, 8.7)                           | 1.0 (0.5, 2.1)                     |
| CMG: High ( <i>Referent</i> )                                                                                                                                  | 15               | 5.1 (2.8, 8.3)                           | <i>Reference</i>                   |
| Outcome: Dialysis <sup>†</sup>                                                                                                                                 |                  |                                          |                                    |
| CMG: Low (vs High)                                                                                                                                             | 9                | 3.5 (1.4, 5.7)                           | 3.3 (0.7, 15.7)                    |
| CMG: Medium (vs High)                                                                                                                                          | 6                | 2.3 (0.7, 4.4)                           | 1.1 (0.3, 4.6)                     |
| CMG: High ( <i>Referent</i> )                                                                                                                                  | 4                | 1.4 (0.4, 3.4)                           | <i>Reference</i>                   |
| <b>(C) P-cresol sulfate</b>                                                                                                                                    |                  |                                          |                                    |
| Outcome: Death <sup>†</sup>                                                                                                                                    |                  |                                          |                                    |
| PCS: Low (vs High)                                                                                                                                             | 14               | 5.6 (3.3, 9.4)                           | 2.5 (1.0, 6.1)                     |
| PCS: Medium (vs High)                                                                                                                                          | 17               | 6.0 (3.7, 9.6)                           | 1.3 (0.6, 3.1)                     |
| PCS: High ( <i>Referent</i> )                                                                                                                                  | 11               | 4.0 (2.2, 7.2)                           | <i>Reference</i>                   |
| Outcome: Dialysis <sup>†</sup>                                                                                                                                 |                  |                                          |                                    |
| PCS: Low (vs High)                                                                                                                                             | 9                | 3.8 (2.0, 7.3)                           | 0.9 (0.2, 4.0)                     |
| PCS: Medium (vs High)                                                                                                                                          | 7                | 2.5 (1.2, 5.3)                           | 1.3 (0.3, 5.4)                     |
| PCS: High ( <i>Referent</i> )                                                                                                                                  | 4                | 1.5 (0.6, 3.9)                           | <i>Reference</i>                   |
| <b>(D) Indoxyl sulfate</b>                                                                                                                                     |                  |                                          |                                    |
| Outcome: Death <sup>†</sup>                                                                                                                                    |                  |                                          |                                    |
| IS: Low (vs High)                                                                                                                                              | 12               | 4.8 (2.7, 8.4)                           | 1.1 (0.5, 2.5)                     |
| IS: Medium (vs High)                                                                                                                                           | 14               | 4.8 (2.8, 8.0)                           | 0.6 (0.3, 1.3)                     |
| IS: High ( <i>Referent</i> )                                                                                                                                   | 16               | 6.0 (3.7, 9.8)                           | <i>Reference</i>                   |
| Outcome: Dialysis <sup>†</sup>                                                                                                                                 |                  |                                          |                                    |
| IS: Low (vs High)                                                                                                                                              | 9                | 3.8 (2.0, 7.4)                           | 1.1 (0.2, 7.1)                     |
| IS: Medium (vs High)                                                                                                                                           | 8                | 2.8 (1.4, 5.6)                           | 1.8 (0.3, 9.7)                     |
| IS: High ( <i>Referent</i> )                                                                                                                                   | 3                | 1.1 (0.4, 3.5)                           | <i>Reference</i>                   |

<sup>†</sup> 95% confidence intervals calculated from Poisson distribution.

<sup>‡</sup> Cox proportional hazards models, comparing categories of net tubular solute clearance; adjusted for age, sex, black race, other non-white race, albumin excretion rate (AER), and Ur-Cr clearance.
